# Supplementary material for: Chromatin state analysis of the barley epigenome reveals a higher‐order structure defined by H3K27me1 and H3K27me3 abundance
Source: PubMed Central journal article supplement (PMC4973852; doi:10.1111/tpj.12963), 2015-09-09
Supplement: TPJ-84-111-s001.pdf [file TPJ-84-111-s001.pdf]

# 1H

CLASS

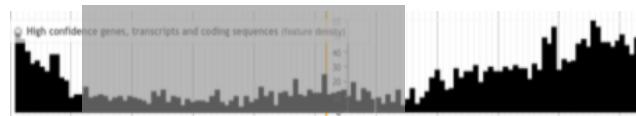

HC Genes

I

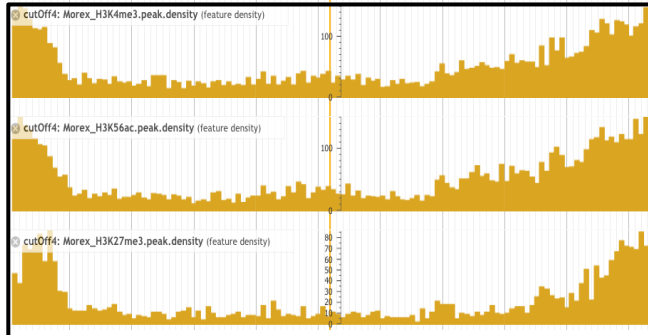

H3K4me3

H3K56ac

H3K27me3

II

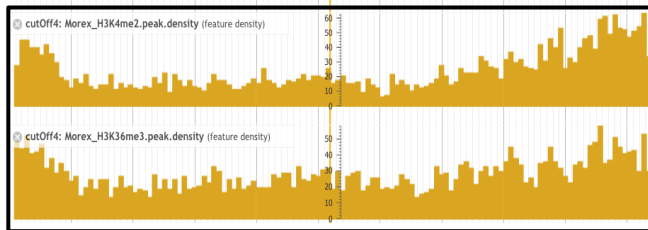

H3K4me2

H3K36me3

III

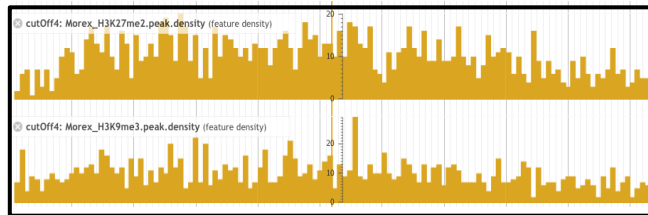

H3K27me2

H3K9me3

IV

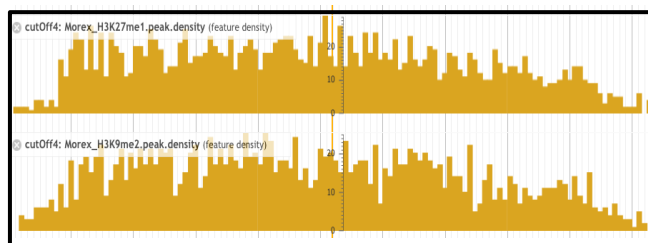

H3K27me1

H3K9me2

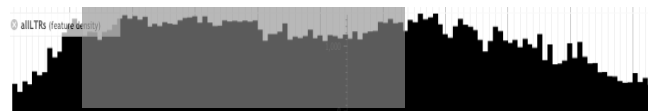

LTR  
Retrotransposons

# 2H

CLASS

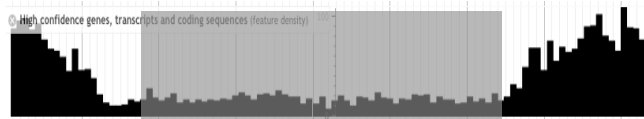

HC Genes

I

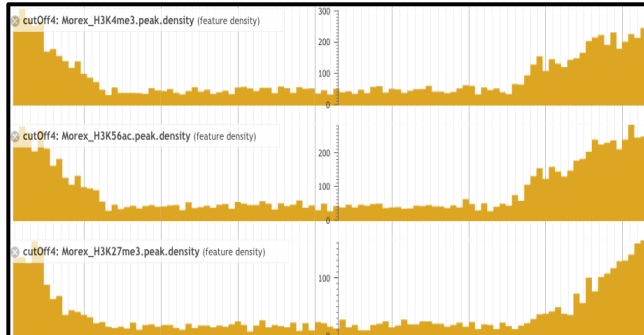

H3K4me3

H3K56ac

H3K27me3

II

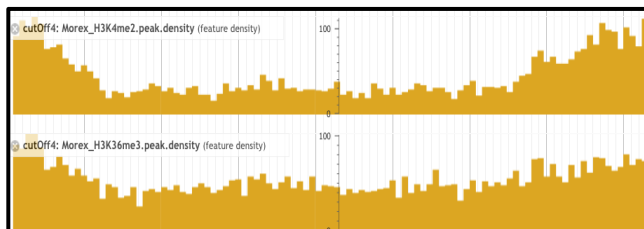

H3K4me2

H3K36me3

III

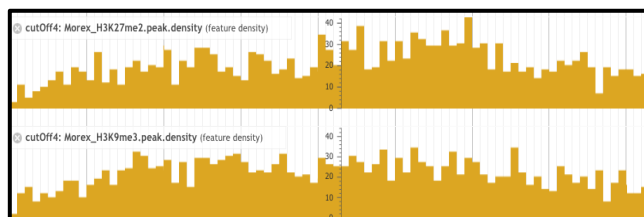

H3K27me2

H3K9me3

IV

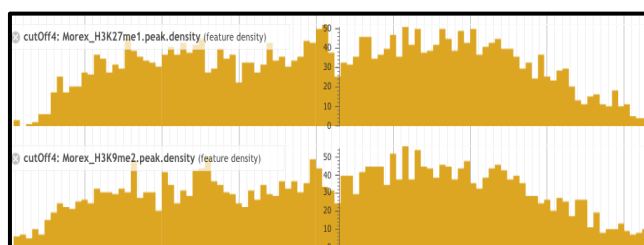

H3K27me1

H3K9me2

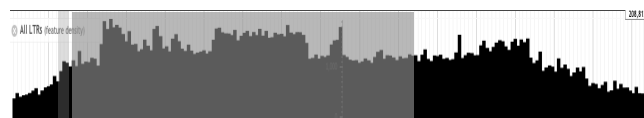

LTR  
Retrotransposons

# 3H

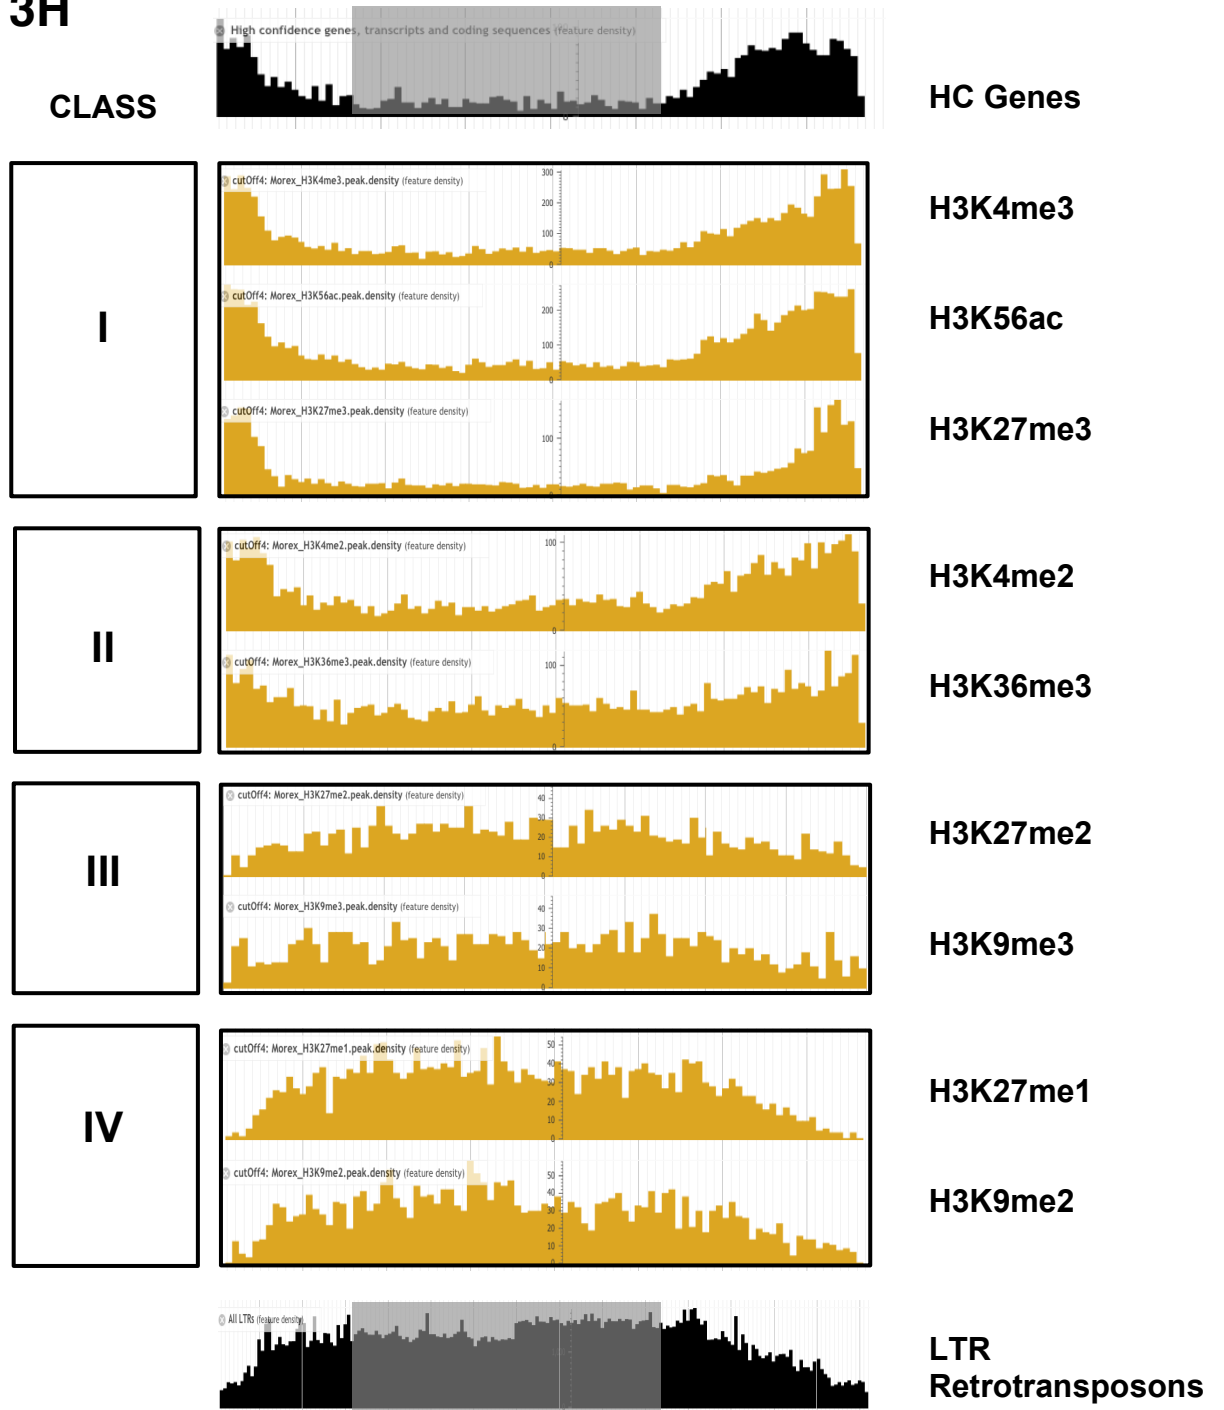

# 4H

CLASS

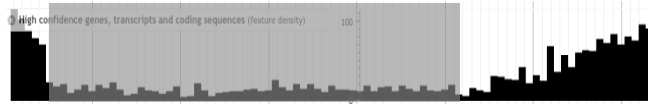

HC Genes

I

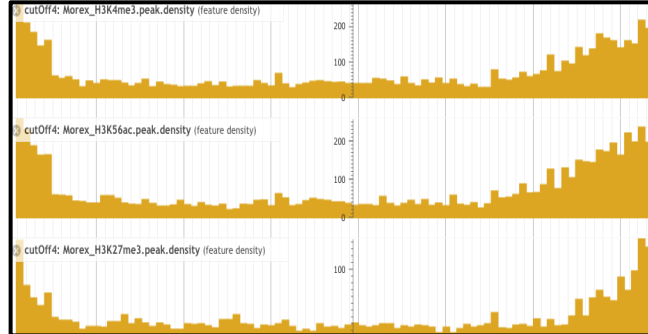

H3K4me3

H3K56ac

H3K27me3

II

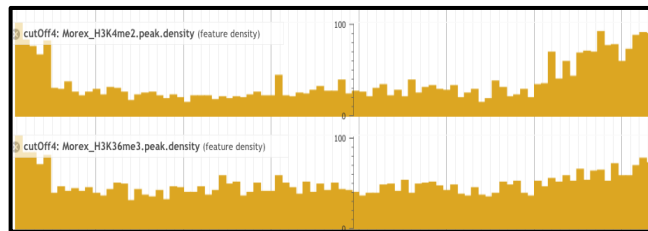

H3K4me2

H3K36me3

III

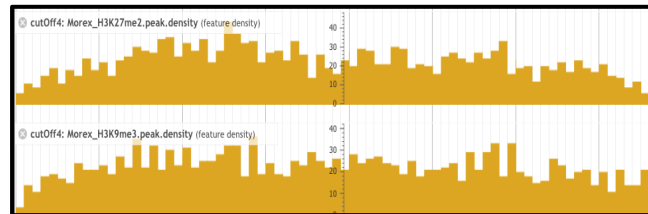

H3K27me2

H3K9me3

IV

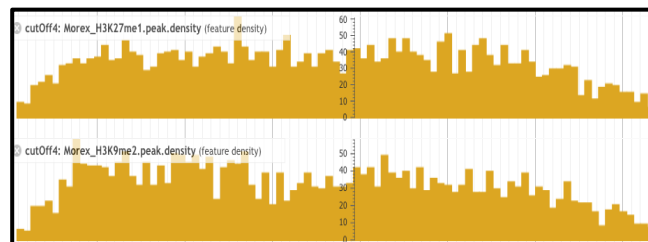

H3K27me1

H3K9me2

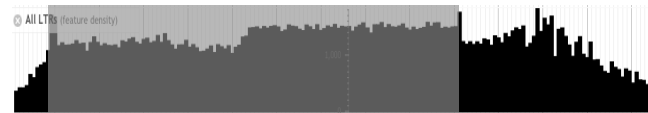

LTR  
Retrotransposons

# 5H

CLASS

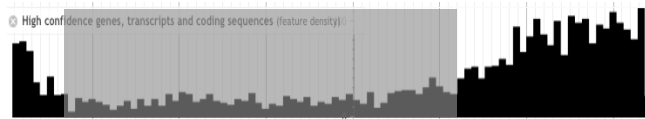

HC Genes

I

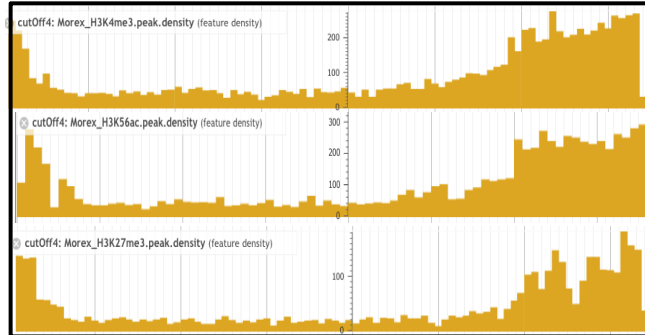

H3K4me3

H3K56ac

H3K27me3

II

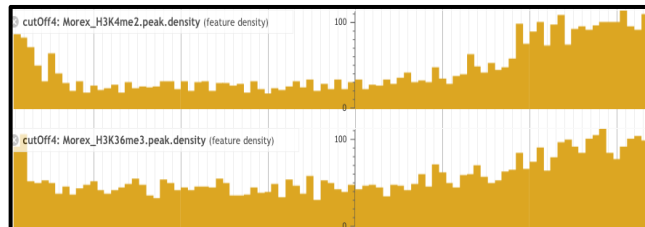

H3K4me2

H3K36me3

III

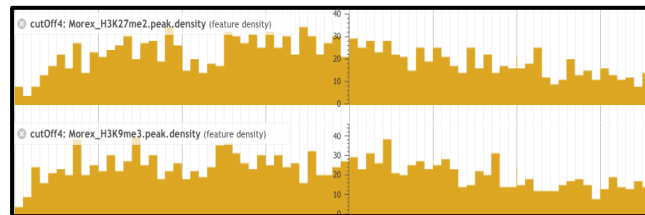

H3K27me2

H3K9me3

IV

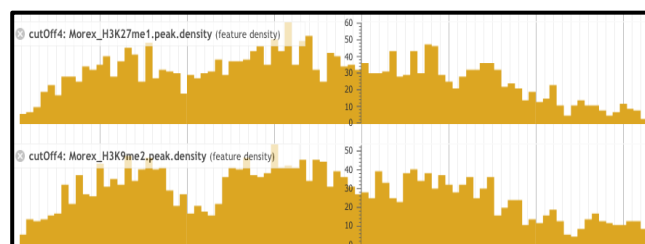

H3K27me1

H3K9me2

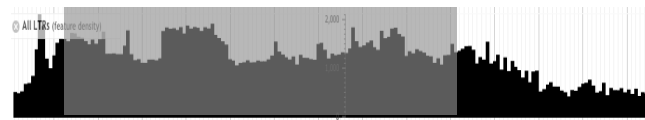

LTR  
Retrotransposons

# 6H

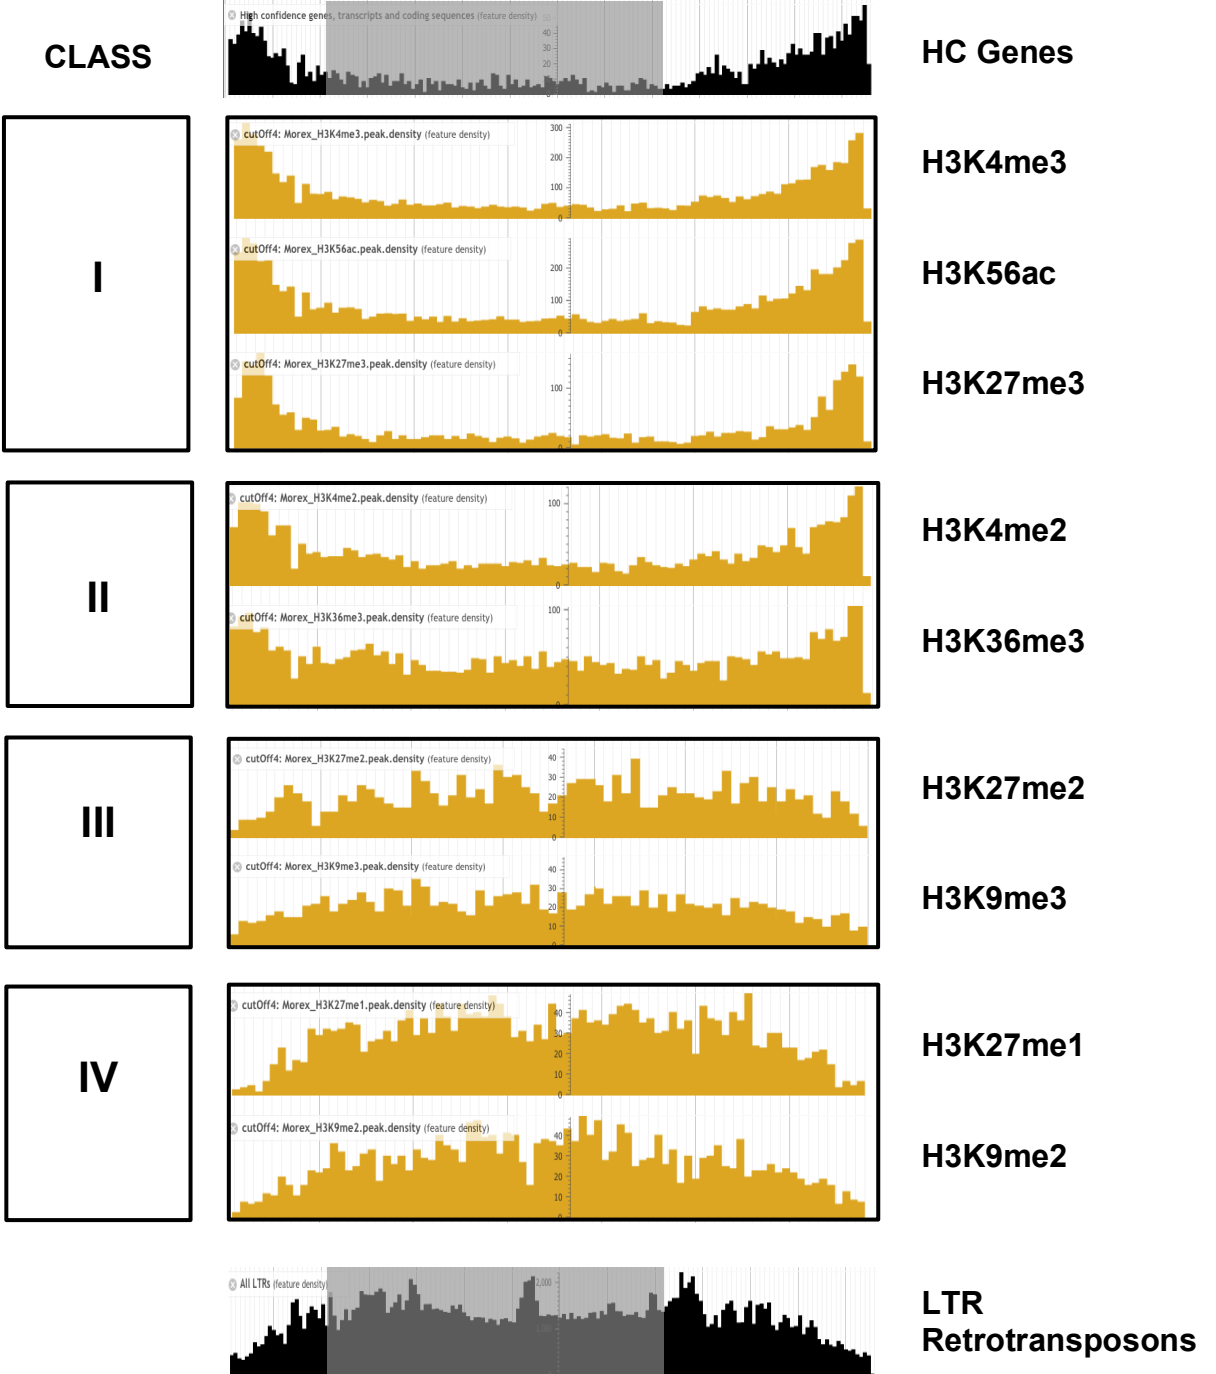

**7H**  
CLASS

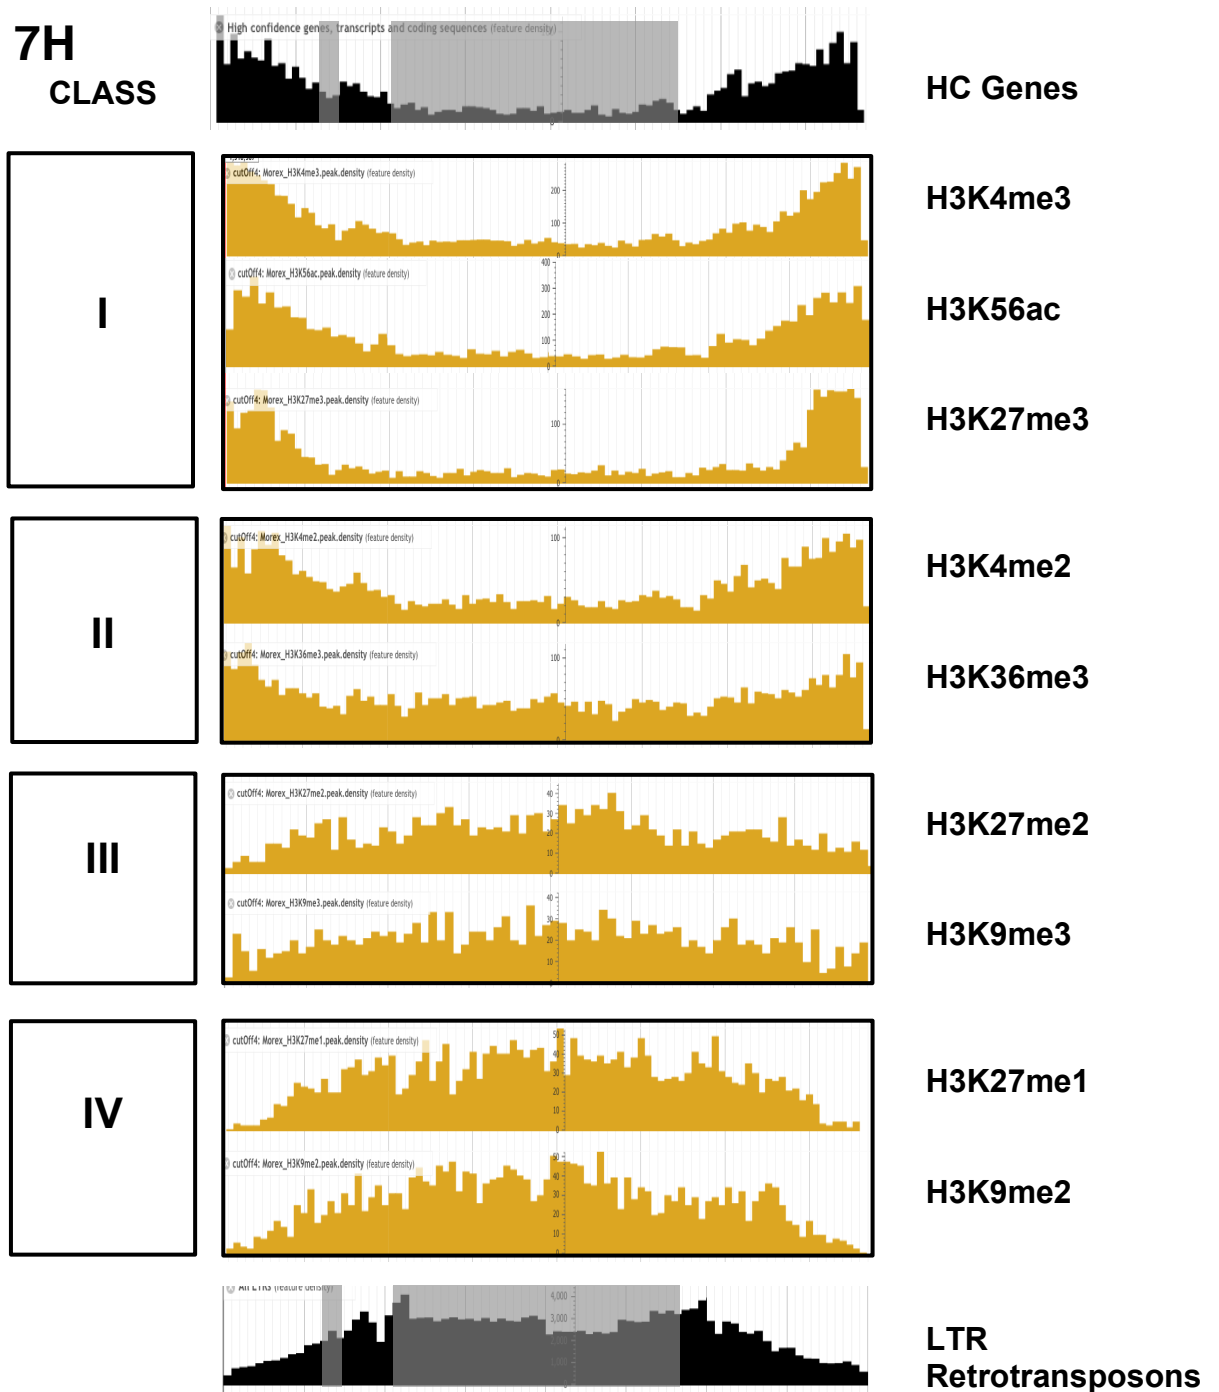

**Figure S1: Peak densities of histone modifications across barley chromosomes:** Local peak densities for the nine histone modifications studied here are plotted against pseudo-physical positions on barley chromosomes in JBrowse (see Methods). Distribution Classes I-IV are described in the text. The distributions of HC genes and LTR retrotransposons are also shown and the location of the LR-PC region (Baker *et al.* 2014) is indicated in grey.
