# Supplementary material for: Chromatin state analysis of the barley epigenome reveals a higher‐order structure defined by H3K27me1 and H3K27me3 abundance
Source: PubMed Central journal article supplement (PMC4973852; doi:10.1111/tpj.12963), 2015-09-09
Supplement: TPJ-84-111-s002.pdf [file TPJ-84-111-s002.pdf]

|    | 1      | 2     | 3     | 4     | 5     | 6     | 7     | 8     | 9     | 10    | 11    | 12    | 13    | 14    | 15    | 16    | 17    | 18    | 19    | 20    |
|----|--------|-------|-------|-------|-------|-------|-------|-------|-------|-------|-------|-------|-------|-------|-------|-------|-------|-------|-------|-------|
| 1  | 0.482  | 0.520 | 0.759 | 0.715 | 0.724 | 0.724 | 0.728 | 0.729 | 0.845 | 0.812 | 0.812 | 0.812 | 0.812 | 0.812 | 1.000 | 1.000 | 1.000 | 1.000 | 1.000 | 1.000 |
| 2  | 0.661  | 0.694 | 0.968 | 0.830 | 0.852 | 0.852 | 0.861 | 0.865 | 0.867 | 0.922 | 0.921 | 0.921 | 0.921 | 1.000 | 1.000 | 1.000 | 1.000 | 1.000 | 1.000 | 1.000 |
| 3  | 0.546  | 0.546 | 0.785 | 0.848 | 0.851 | 0.851 | 0.852 | 0.852 | 0.853 | 0.931 | 0.934 | 0.934 | 0.934 | 1.000 | 1.000 | 1.000 | 1.000 | 1.000 | 1.000 | 1.000 |
| 4  | 0.386  | 0.381 | 0.601 | 0.877 | 0.858 | 0.858 | 0.849 | 0.845 | 0.842 | 0.953 | 0.953 | 0.953 | 0.953 | 0.953 | 1.000 | 1.000 | 1.000 | 1.000 | 1.000 | 1.000 |
| 5  | 0.701  | 0.674 | 0.660 | 0.660 | 0.659 | 0.659 | 0.658 | 0.658 | 0.657 | 0.644 | 0.706 | 0.706 | 0.711 | 0.711 | 0.711 | 0.966 | 0.966 | 0.991 | 0.999 | 1.000 |
| 6  | 0.477  | 0.443 | 0.963 | 0.963 | 0.961 | 0.961 | 0.960 | 0.955 | 0.952 | 0.959 | 0.993 | 0.993 | 0.994 | 0.994 | 0.994 | 0.997 | 0.997 | 1.000 | 1.000 | 1.000 |
| 7  | 0.465  | 0.471 | 0.692 | 0.692 | 0.693 | 0.693 | 0.693 | 0.693 | 0.696 | 0.700 | 0.721 | 0.721 | 0.991 | 0.991 | 0.991 | 0.995 | 0.995 | 1.000 | 1.000 | 1.000 |
| 8  | 0.207  | 0.248 | 0.365 | 0.659 | 0.659 | 0.807 | 0.807 | 0.804 | 0.803 | 0.803 | 0.803 | 0.985 | 0.985 | 0.985 | 0.985 | 0.985 | 1.000 | 1.000 | 1.000 | 1.000 |
| 9  | 0.382  | 0.437 | 0.581 | 0.947 | 0.947 | 0.971 | 0.972 | 0.973 | 0.973 | 0.973 | 0.973 | 0.931 | 0.931 | 0.931 | 0.931 | 0.931 | 1.000 | 1.000 | 1.000 | 1.000 |
| 10 | 0.189  | 0.220 | 0.265 | 0.424 | 0.425 | 0.443 | 0.443 | 0.445 | 0.646 | 1.000 | 1.000 | 1.000 | 1.000 | 1.000 | 1.000 | 1.000 | 1.000 | 1.000 | 1.000 | 1.000 |
| 11 | 0.605  | 0.613 | 0.749 | 0.749 | 0.752 | 0.752 | 0.753 | 0.759 | 0.762 | 0.760 | 0.794 | 0.794 | 0.877 | 0.877 | 0.877 | 0.864 | 0.864 | 0.863 | 1.000 | 1.000 |
| 12 | 0.777  | 0.787 | 0.682 | 0.682 | 0.687 | 0.687 | 0.690 | 0.702 | 0.708 | 0.693 | 0.978 | 0.978 | 0.967 | 0.967 | 0.967 | 0.965 | 0.965 | 0.972 | 1.000 | 1.000 |
| 13 | 0.628  | 0.609 | 0.743 | 0.743 | 0.745 | 0.745 | 0.746 | 0.749 | 0.751 | 0.742 | 0.774 | 0.774 | 0.704 | 0.704 | 0.704 | 0.712 | 0.713 | 1.000 | 1.000 | 1.000 |
| 14 | 0.373  | 0.384 | 0.483 | 0.622 | 0.621 | 1.000 | 1.000 | 1.000 | 1.000 | 1.000 | 1.000 | 1.000 | 1.000 | 1.000 | 1.000 | 1.000 | 1.000 | 1.000 | 1.000 | 1.000 |
| 15 | -0.429 | 0.170 | 0.170 | 0.170 | 0.363 | 0.363 | 0.616 | 0.999 | 0.995 | 0.994 | 1.000 | 1.000 | 1.000 | 1.000 | 1.000 | 1.000 | 1.000 | 1.000 | 1.000 | 1.000 |
| 16 | -0.363 | 0.173 | 0.175 | 0.175 | 0.416 | 0.416 | 0.717 | 0.999 | 0.999 | 0.999 | 0.999 | 0.999 | 1.000 | 1.000 | 1.000 | 1.000 | 1.000 | 1.000 | 1.000 | 1.000 |
| 17 | -0.419 | 0.224 | 0.227 | 0.226 | 0.431 | 0.431 | 0.696 | 0.983 | 0.983 | 0.983 | 0.984 | 0.984 | 0.985 | 0.985 | 0.985 | 0.987 | 1.000 | 1.000 | 1.000 | 1.000 |
| 18 | -0.328 | 0.495 | 0.494 | 0.494 | 0.663 | 0.663 | 1.000 | 1.000 | 1.000 | 1.000 | 1.000 | 1.000 | 1.000 | 1.000 | 1.000 | 1.000 | 1.000 | 1.000 | 1.000 | 1.000 |
| 19 | -0.004 | 0.299 | 0.298 | 0.451 | 0.752 | 0.752 | 0.752 | 0.752 | 0.752 | 0.751 | 0.751 | 0.751 | 0.751 | 0.750 | 0.750 | 0.746 | 0.746 | 0.746 | 0.745 | 1.000 |
| 20 | -0.371 | 0.660 | 0.659 | 0.660 | 0.988 | 0.988 | 0.988 | 0.988 | 0.988 | 0.988 | 0.988 | 0.988 | 0.988 | 0.988 | 0.988 | 0.989 | 0.989 | 0.989 | 0.989 | 1.000 |

**Figure S2: Performance characteristics of different chromatin state models:** Each column represents a state model for a state number between 1 and 20. Each cell represents the performance of the corresponding state model *versus* the 20-state model. Performance values are colour-coded. The optimum state model combines a minimal number of states and a maximal set of performance values. The vertical grey lines highlight the 11-state model used in this study (comprising 10 states with modified histone occupancies and 1 zero-modification state).
