# Supplementary material for: Chromatin state analysis of the barley epigenome reveals a higher‐order structure defined by H3K27me1 and H3K27me3 abundance
Source: PubMed Central journal article supplement (PMC4973852; doi:10.1111/tpj.12963), 2015-09-09
Supplement: TPJ-84-111-s004.pdf [file TPJ-84-111-s004.pdf]

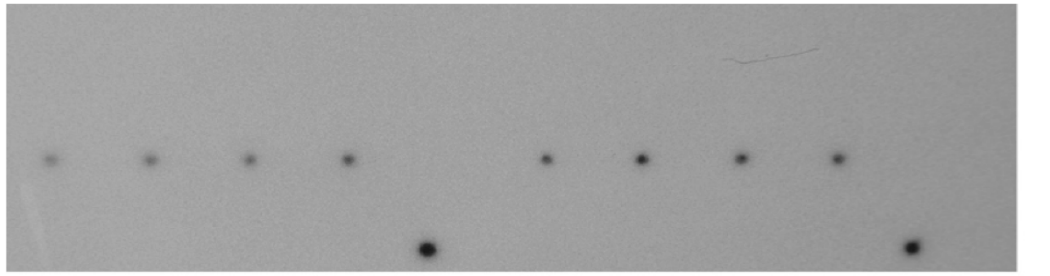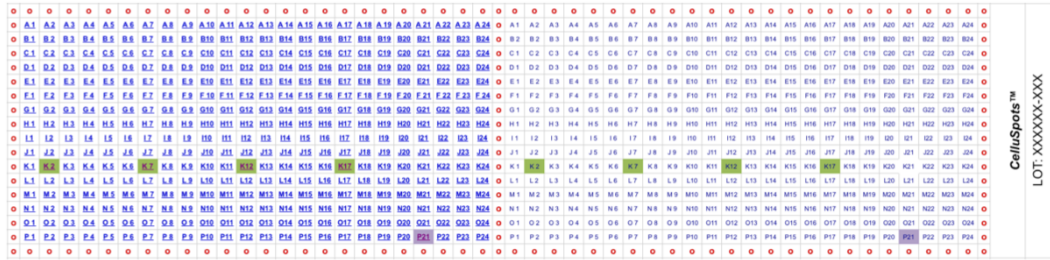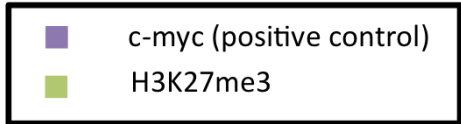

**Figure S4: H3K27me3 histone antibody validation:** The H3K27me3 antibody batch used in this study was checked by binding to the Active Motif MODified Histone Peptide Array (cat.no. 13005) using the manufacturers protocol. Green sectors in the key refer to peptides containing H3K27me3. Purple sectors refer to peptides containing c-myc positive control.
