# Supplementary material for: Chromatin state analysis of the barley epigenome reveals a higher‐order structure defined by H3K27me1 and H3K27me3 abundance
Source: PubMed Central journal article supplement (PMC4973852; doi:10.1111/tpj.12963), 2015-09-09
Supplement: TPJ-84-111-s005.pdf [file TPJ-84-111-s005.pdf]

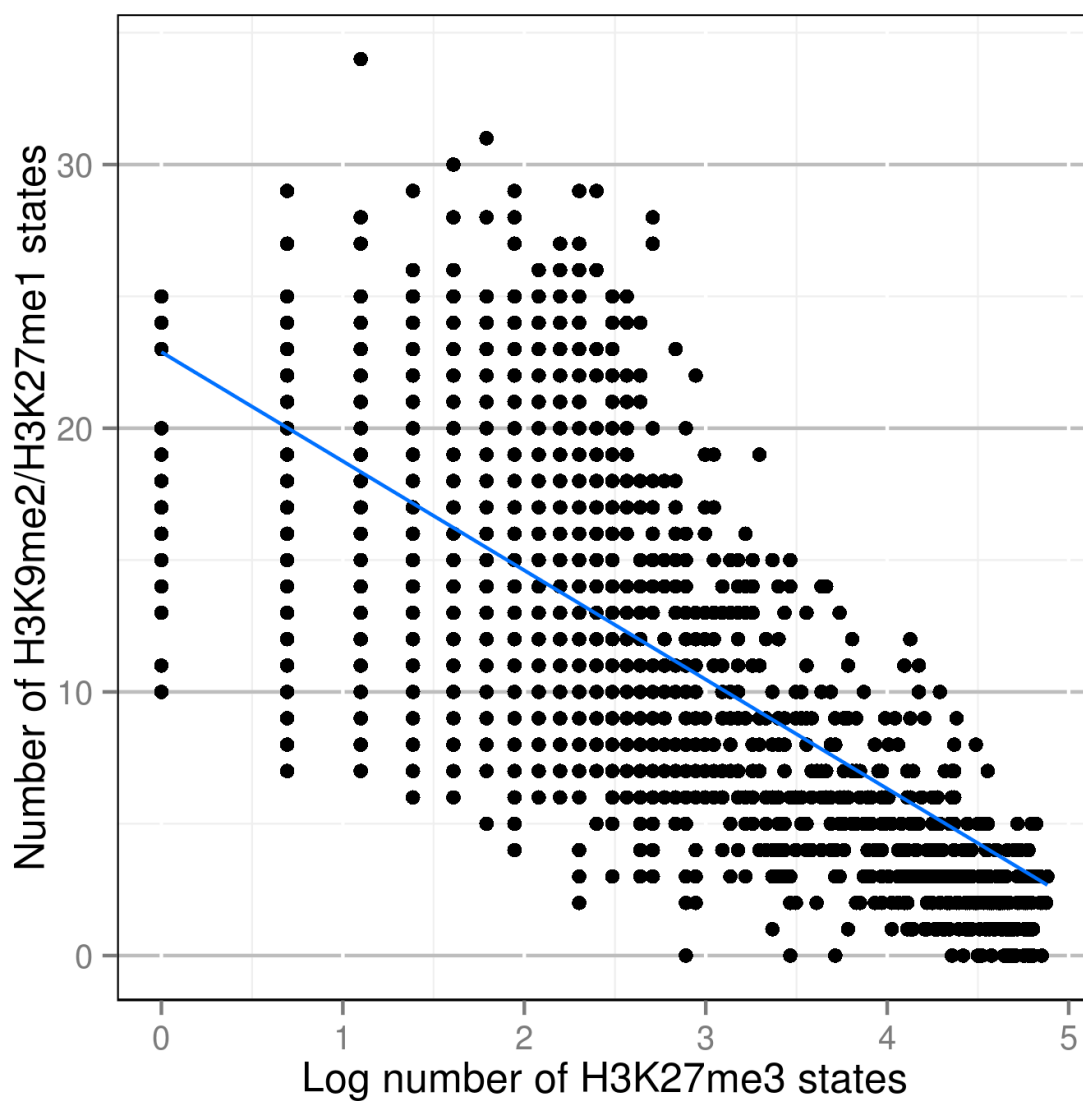

**Figure S5: Relationship between distribution of H3K27me3 and H3K27me1/H3K9me2:** Each spot represents a 0.5 Mbp bin containing the corresponding number of chromatin states for [H3k9me2+H3K27me1] and [H3K27me3] over the entire Barley genome. Log = natural logarithm.
