# Supplementary material for: Chromatin state analysis of the barley epigenome reveals a higher‐order structure defined by H3K27me1 and H3K27me3 abundance
Source: PubMed Central journal article supplement (PMC4973852; doi:10.1111/tpj.12963), 2015-09-09
Supplement: TPJ-84-111-s006.pdf [file TPJ-84-111-s006.pdf]

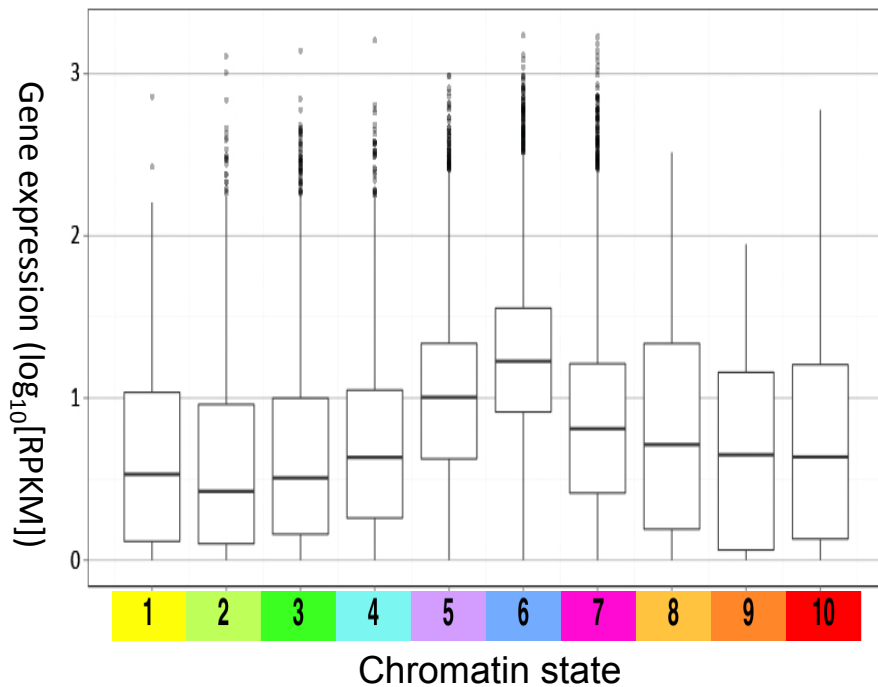

**Figure S6: Average gene expression levels in chromatin states:** Gene expression values are derived from RNA-seq data in total barley seedling ([IBGSC 2012](#)) and expressed as  $\log_{10}$  RPKM of genes in each chromatin state (see Methods). Boxplots indicate median gene expression (central box line), interquartile range (IQR; Q3-Q1) and whiskers extend to 1.5 IQR in both directions. Points are outliers with gene expression greater than  $Q3 + 1.5$  IQR. Chromatin states are colour-coded as in Figures 3-5.
