# Supplementary material for: Chromatin state analysis of the barley epigenome reveals a higher‐order structure defined by H3K27me1 and H3K27me3 abundance
Source: PubMed Central journal article supplement (PMC4973852; doi:10.1111/tpj.12963), 2015-09-09
Supplement: TPJ-84-111-s008.pdf [file TPJ-84-111-s008.pdf]

**Table S1: Peak numbers for histone modifications in this study**

| <b>Histone epitope</b> | <b>Numbers of peaks per chromosome</b> |           |           |           |           |           |           | <b>Total</b> |
|------------------------|----------------------------------------|-----------|-----------|-----------|-----------|-----------|-----------|--------------|
|                        | <b>1H</b>                              | <b>2H</b> | <b>3H</b> | <b>4H</b> | <b>5H</b> | <b>6H</b> | <b>7H</b> |              |
| <b>H3K4me2</b>         | 3171                                   | 4696      | 4375      | 3385      | 4233      | 3469      | 4246      | 27575        |
| <b>H3K4me3</b>         | 6625                                   | 9398      | 8808      | 6507      | 8788      | 7057      | 9140      | 56323        |
| <b>H3K9me2</b>         | 1756                                   | 3098      | 2688      | 2931      | 2479      | 2257      | 2588      | 17797        |
| <b>H3K9me3</b>         | 1278                                   | 2228      | 1973      | 2090      | 1986      | 1815      | 1970      | 13340        |
| <b>H3K27me1</b>        | 1863                                   | 3132      | 2706      | 3045      | 2549      | 2433      | 2612      | 18340        |
| <b>H3K27me2</b>        | 1300                                   | 2165      | 1911      | 2075      | 1870      | 1719      | 1947      | 12987        |
| <b>H3K27me3</b>        | 2791                                   | 4147      | 3703      | 2792      | 4181      | 3053      | 4148      | 24815        |
| <b>H3K36me3</b>        | 3647                                   | 5575      | 5391      | 4508      | 5225      | 4270      | 5032      | 33648        |
| <b>H3K56ac</b>         | 6622                                   | 9408      | 8926      | 6678      | 9303      | 7442      | 10135     | 58514        |
| <b>H3</b>              | 775                                    | 1404      | 1212      | 1291      | 1101      | 972       | 1133      | 7888         |
| <b>Total</b>           | 29828                                  | 45251     | 41693     | 35302     | 41715     | 34487     | 42951     | 271227       |
