# Supplementary material for: Chromatin state analysis of the barley epigenome reveals a higher‐order structure defined by H3K27me1 and H3K27me3 abundance
Source: PubMed Central journal article supplement (PMC4973852; doi:10.1111/tpj.12963), 2015-09-09
Supplement: TPJ-84-111-s009.pdf [file TPJ-84-111-s009.pdf]

**Table S2: Peak numbers for modified histones that are associated with genes**

| <b>CLASS I</b>          |                |                |                 |
|-------------------------|----------------|----------------|-----------------|
| <b>Expression level</b> | <b>H3K4me3</b> | <b>H3K56ac</b> | <b>H3K27me3</b> |
| <b>zero</b>             | 180            | 106            | 228             |
| <b>low</b>              | 2766           | 2285           | 1289            |
| <b>mid</b>              | 3079           | 2915           | 707             |
| <b>high</b>             | 3145           | 2958           | 498             |

| <b>CLASS II</b>         |                |                 |
|-------------------------|----------------|-----------------|
| <b>Expression level</b> | <b>H3K4me2</b> | <b>H3K36me3</b> |
| <b>zero</b>             | 168            | 64              |
| <b>low</b>              | 2478           | 1166            |
| <b>mid</b>              | 2320           | 2099            |
| <b>high</b>             | 1834           | 2556            |

| <b>CLASS III</b>        |                 |                |
|-------------------------|-----------------|----------------|
| <b>Expression level</b> | <b>H3K27me2</b> | <b>H3K9me3</b> |
| <b>zero</b>             | 11              | 12             |
| <b>low</b>              | 47              | 60             |
| <b>mid</b>              | 21              | 56             |
| <b>high</b>             | 20              | 45             |

| <b>CLASS IV</b>         |                 |                |
|-------------------------|-----------------|----------------|
| <b>Expression level</b> | <b>H3K27me1</b> | <b>H3K9me2</b> |
| <b>zero</b>             | 7               | 8              |
| <b>low</b>              | 37              | 38             |
| <b>mid</b>              | 23              | 36             |
| <b>high</b>             | 18              | 25             |

Expression level bins are defined in Methods.
