# Supplementary material for: Chromatin state analysis of the barley epigenome reveals a higher‐order structure defined by H3K27me1 and H3K27me3 abundance
Source: PubMed Central journal article supplement (PMC4973852; doi:10.1111/tpj.12963), 2015-09-09
Supplement: TPJ-84-111-s010.pdf [file TPJ-84-111-s010.pdf]

Table S3

| STATE                  | H3K27me1 | H3K27me2 | H3K27me3 | H3K36me3 | H3K4me2 | H3K4me3 | H3K56ac | H3K9me2 | H3K9me3 | State number |
|------------------------|----------|----------|----------|----------|---------|---------|---------|---------|---------|--------------|
| state (Emission order) | H3K27me1 | H3K27me2 | H3K27me3 | H3K36me3 | H3K4me2 | H3K4me3 | H3K56ac | H3K9me2 | H3K9me3 | 1            |
| 1                      | 0.019    | 0.021    | 0.103    | 0.073    | 0.089   | 0.093   | 0.077   | 0.032   | 0.028   |              |
| state (Emission order) | H3K27me1 | H3K27me2 | H3K27me3 | H3K36me3 | H3K4me2 | H3K4me3 | H3K56ac | H3K9me2 | H3K9me3 | 2            |
| 1                      | 0.019    | 0.000    | 0.000    | 0.000    | 0.031   | 0.033   | 0.000   | 0.020   | 0.000   |              |
| 2                      | 0.018    | 0.374    | 0.295    | 0.416    | 0.020   | 0.027   | 0.308   | 0.026   | 0.357   |              |
| state (Emission order) | H3K27me1 | H3K27me2 | H3K27me3 | H3K36me3 | H3K4me2 | H3K4me3 | H3K56ac | H3K9me2 | H3K9me3 | 3            |
| 1                      | 0.031    | 0.020    | 0.000    | 0.000    | 0.000   | 0.000   | 0.000   | 0.033   | 0.019   |              |
| 2                      | 0.010    | 0.040    | 0.999    | 0.107    | 0.207   | 0.215   | 0.158   | 0.013   | 0.024   |              |
| 3                      | 0.027    | 0.015    | 0.000    | 0.572    | 0.470   | 0.379   | 0.397   | 0.036   | 0.013   |              |
| state (Emission order) | H3K27me1 | H3K27me2 | H3K27me3 | H3K36me3 | H3K4me2 | H3K4me3 | H3K56ac | H3K9me2 | H3K9me3 | 4            |
| 1                      | 0.031    | 0.020    | 0.000    | 0.000    | 0.000   | 0.000   | 0.000   | 0.033   | 0.019   |              |
| 2                      | 0.010    | 0.040    | 0.999    | 0.107    | 0.207   | 0.215   | 0.158   | 0.013   | 0.024   |              |
| 3                      | 0.009    | 0.014    | 0.000    | 0.000    | 0.505   | 0.456   | 0.552   | 0.009   | 0.012   |              |
| 4                      | 0.040    | 0.015    | 0.000    | 0.999    | 0.444   | 0.323   | 0.282   | 0.056   | 0.014   |              |
| state (Emission order) | H3K27me1 | H3K27me2 | H3K27me3 | H3K36me3 | H3K4me2 | H3K4me3 | H3K56ac | H3K9me2 | H3K9me3 | 5            |
| 1                      | 0.027    | 0.020    | 0.000    | 0.000    | 0.000   | 0.000   | 0.000   | 0.000   | 0.019   |              |
| 2                      | 0.167    | 0.030    | 0.041    | 0.156    | 0.014   | 0.006   | 0.007   | 0.998   | 0.031   |              |
| 3                      | 0.027    | 0.014    | 0.000    | 0.999    | 0.468   | 0.342   | 0.298   | 0.001   | 0.013   |              |
| 4                      | 0.008    | 0.014    | 0.000    | 0.000    | 0.506   | 0.458   | 0.555   | 0.001   | 0.012   |              |
| 5                      | 0.008    | 0.039    | 0.999    | 0.104    | 0.209   | 0.217   | 0.159   | 0.001   | 0.024   |              |
| state (Emission order) | H3K27me1 | H3K27me2 | H3K27me3 | H3K36me3 | H3K4me2 | H3K4me3 | H3K56ac | H3K9me2 | H3K9me3 | 6            |
| 1                      | 0.027    | 0.020    | 0.000    | 0.000    | 0.000   | 0.000   | 0.000   | 0.000   | 0.019   |              |
| 2                      | 0.167    | 0.030    | 0.041    | 0.156    | 0.014   | 0.006   | 0.007   | 0.998   | 0.031   |              |
| 3                      | 0.027    | 0.014    | 0.000    | 1.000    | 0.468   | 0.342   | 0.299   | 0.001   | 0.013   |              |
| 4                      | 0.011    | 0.017    | 0.000    | 0.000    | 0.999   | 0.283   | 0.001   | 0.001   | 0.012   |              |
| 5                      | 0.007    | 0.012    | 0.000    | 0.000    | 0.294   | 0.551   | 0.825   | 0.001   | 0.012   |              |
| 6                      | 0.008    | 0.039    | 0.999    | 0.104    | 0.209   | 0.217   | 0.159   | 0.001   | 0.024   |              |
| state (Emission order) | H3K27me1 | H3K27me2 | H3K27me3 | H3K36me3 | H3K4me2 | H3K4me3 | H3K56ac | H3K9me2 | H3K9me3 | 7            |
| 1                      | 0.000    | 0.020    | 0.000    | 0.000    | 0.000   | 0.000   | 0.000   | 0.000   | 0.018   |              |
| 2                      | 0.998    | 0.031    | 0.033    | 0.097    | 0.014   | 0.005   | 0.008   | 0.000   | 0.029   |              |
| 3                      | 0.167    | 0.030    | 0.041    | 0.156    | 0.014   | 0.006   | 0.007   | 0.999   | 0.031   |              |
| 4                      | 0.001    | 0.013    | 0.000    | 1.000    | 0.479   | 0.351   | 0.306   | 0.001   | 0.012   |              |
| 5                      | 0.001    | 0.017    | 0.000    | 0.000    | 0.999   | 0.286   | 0.001   | 0.001   | 0.011   |              |
| 6                      | 0.001    | 0.012    | 0.000    | 0.000    | 0.295   | 0.552   | 0.827   | 0.001   | 0.012   |              |
| 7                      | 0.000    | 0.038    | 0.999    | 0.103    | 0.210   | 0.219   | 0.160   | 0.001   | 0.023   |              |
| state (Emission order) | H3K27me1 | H3K27me2 | H3K27me3 | H3K36me3 | H3K4me2 | H3K4me3 | H3K56ac | H3K9me2 | H3K9me3 | 8            |
| 1                      | 0.167    | 0.030    | 0.041    | 0.156    | 0.014   | 0.006   | 0.007   | 0.999   | 0.031   |              |
| 2                      | 0.998    | 0.029    | 0.032    | 0.097    | 0.014   | 0.005   | 0.008   | 0.000   | 0.028   |              |
| 3                      | 0.000    | 0.000    | 0.000    | 0.000    | 0.000   | 0.000   | 0.000   | 0.000   | 0.017   |              |
| 4                      | 0.003    | 0.998    | 0.198    | 0.074    | 0.041   | 0.023   | 0.044   | 0.000   | 0.077   |              |
| 5                      | 0.001    | 0.000    | 0.999    | 0.102    | 0.215   | 0.225   | 0.161   | 0.001   | 0.020   |              |
| 6                      | 0.001    | 0.000    | 0.000    | 0.000    | 0.999   | 0.289   | 0.001   | 0.001   | 0.010   |              |
| 7                      | 0.001    | 0.001    | 0.000    | 1.000    | 0.484   | 0.355   | 0.310   | 0.001   | 0.011   |              |
| 8                      | 0.001    | 0.001    | 0.000    | 0.000    | 0.298   | 0.555   | 0.828   | 0.001   | 0.011   |              |
| state (Emission order) | H3K27me1 | H3K27me2 | H3K27me3 | H3K36me3 | H3K4me2 | H3K4me3 | H3K56ac | H3K9me2 | H3K9me3 | 9            |
| 1                      | 0.998    | 0.029    | 0.032    | 0.097    | 0.014   | 0.005   | 0.008   | 0.000   | 0.028   |              |
| 2                      | 0.167    | 0.030    | 0.041    | 0.156    | 0.014   | 0.006   | 0.007   | 0.999   | 0.031   |              |
| 3                      | 0.000    | 0.000    | 0.000    | 0.000    | 0.000   | 0.000   | 0.000   | 0.000   | 0.000   |              |
| 4                      | 0.001    | 0.001    | 0.000    | 1.000    | 0.488   | 0.357   | 0.312   | 0.001   | 0.003   |              |
| 5                      | 0.001    | 0.000    | 0.000    | 0.000    | 0.999   | 0.291   | 0.000   | 0.001   | 0.002   |              |
| 6                      | 0.001    | 0.001    | 0.000    | 0.000    | 0.300   | 0.557   | 0.829   | 0.001   | 0.003   |              |
| 7                      | 0.001    | 0.000    | 0.999    | 0.102    | 0.218   | 0.228   | 0.162   | 0.001   | 0.004   |              |
| 8                      | 0.003    | 0.999    | 0.198    | 0.074    | 0.041   | 0.023   | 0.045   | 0.000   | 0.077   |              |
| 9                      | 0.000    | 0.000    | 0.107    | 0.052    | 0.019   | 0.010   | 0.028   | 0.000   | 0.999   |              |
| state (Emission order) | H3K27me1 | H3K27me2 | H3K27me3 | H3K36me3 | H3K4me2 | H3K4me3 | H3K56ac | H3K9me2 | H3K9me3 | 10           |
| 1                      | 0.999    | 0.029    | 0.032    | 0.094    | 0.011   | 0.005   | 0.008   | 0.000   | 0.028   |              |
| 2                      | 0.167    | 0.030    | 0.041    | 0.154    | 0.012   | 0.006   | 0.007   | 0.999   | 0.031   |              |
| 3                      | 0.001    | 0.000    | 0.000    | 0.999    | 0.000   | 0.268   | 0.266   | 0.001   | 0.001   |              |
| 4                      | 0.003    | 0.003    | 0.074    | 1.000    | 1.000   | 0.465   | 0.362   | 0.004   | 0.007   |              |
| 5                      | 0.001    | 0.000    | 0.000    | 0.000    | 0.999   | 0.291   | 0.001   | 0.001   | 0.002   |              |

|    |       |       |       |       |       |       |       |       |       |
|----|-------|-------|-------|-------|-------|-------|-------|-------|-------|
| 6  | 0.001 | 0.001 | 0.000 | 0.000 | 0.300 | 0.557 | 0.830 | 0.001 | 0.003 |
| 7  | 0.000 | 0.000 | 0.000 | 0.000 | 0.000 | 0.000 | 0.000 | 0.000 | 0.000 |
| 8  | 0.000 | 0.000 | 0.999 | 0.075 | 0.194 | 0.214 | 0.155 | 0.001 | 0.003 |
| 9  | 0.003 | 0.999 | 0.196 | 0.070 | 0.037 | 0.021 | 0.043 | 0.000 | 0.077 |
| 10 | 0.000 | 0.000 | 0.108 | 0.051 | 0.016 | 0.011 | 0.029 | 0.000 | 0.999 |

| state (Emission order) | H3K27me1 | H3K27me2 | H3K27me3 | H3K36me3 | H3K4me2 | H3K4me3 | H3K56ac | H3K9me2 | H3K9me3 | 11 |
|------------------------|----------|----------|----------|----------|---------|---------|---------|---------|---------|----|
| 1                      | 0.003    | 0.999    | 0.186    | 0.069    | 0.027   | 0.011   | 0.036   | 0.000   | 0.077   |    |
| 2                      | 0.000    | 0.000    | 0.999    | 0.081    | 0.000   | 0.000   | 0.098   | 0.000   | 0.022   |    |
| 3                      | 0.003    | 0.010    | 0.999    | 0.154    | 0.708   | 0.737   | 0.308   | 0.005   | 0.016   |    |
| 4                      | 0.001    | 0.001    | 0.000    | 0.000    | 0.999   | 0.292   | 0.001   | 0.001   | 0.002   |    |
| 5                      | 0.004    | 0.002    | 0.000    | 1.000    | 1.000   | 0.449   | 0.358   | 0.003   | 0.006   |    |
| 6                      | 0.001    | 0.000    | 0.000    | 0.999    | 0.000   | 0.269   | 0.266   | 0.001   | 0.001   |    |
| 11 (7)                 | 0.000    | 0.000    | 0.000    | 0.000    | 0.000   | 0.000   | 0.000   | 0.000   | 0.000   |    |
| 7 (8)                  | 0.001    | 0.001    | 0.000    | 0.000    | 0.300   | 0.558   | 0.830   | 0.001   | 0.004   |    |
| 8 (9)                  | 0.000    | 0.000    | 0.001    | 0.043    | 0.012   | 0.008   | 0.018   | 0.000   | 0.999   |    |
| 9 (10)                 | 0.999    | 0.029    | 0.031    | 0.094    | 0.010   | 0.005   | 0.008   | 0.000   | 0.028   |    |
| 10 (11)                | 0.167    | 0.030    | 0.040    | 0.154    | 0.012   | 0.005   | 0.007   | 0.999   | 0.031   |    |

For the 11-state model that was chosen for this study the states were reordered in the manuscript to place the zero state (no associated histone peaks) last (i.e. 7->11). Numbers in brackets are the original state numbers outputted by ChromHMM.

| state (Emission order) | H3K27me1 | H3K27me2 | H3K27me3 | H3K36me3 | H3K4me2 | H3K4me3 | H3K56ac | H3K9me2 | H3K9me3 | 12 |
|------------------------|----------|----------|----------|----------|---------|---------|---------|---------|---------|----|
| 1                      | 0.003    | 0.999    | 0.186    | 0.069    | 0.027   | 0.011   | 0.035   | 0.000   | 0.077   |    |
| 2                      | 0.000    | 0.000    | 0.999    | 0.081    | 0.000   | 0.000   | 0.098   | 0.000   | 0.022   |    |
| 3                      | 0.003    | 0.010    | 0.999    | 0.154    | 0.708   | 0.737   | 0.308   | 0.005   | 0.016   |    |
| 4                      | 0.001    | 0.001    | 0.000    | 0.000    | 0.999   | 0.297   | 0.001   | 0.002   | 0.002   |    |
| 5                      | 0.004    | 0.002    | 0.000    | 1.000    | 1.000   | 0.449   | 0.358   | 0.003   | 0.006   |    |
| 6                      | 0.001    | 0.000    | 0.000    | 0.999    | 0.000   | 0.268   | 0.266   | 0.001   | 0.001   |    |
| 7                      | 0.000    | 0.000    | 0.000    | 0.000    | 0.000   | 0.995   | 0.000   | 0.000   | 0.000   |    |
| 8                      | 0.002    | 0.002    | 0.000    | 0.000    | 0.350   | 0.490   | 0.998   | 0.001   | 0.004   |    |
| 9                      | 0.000    | 0.000    | 0.000    | 0.000    | 0.000   | 0.000   | 0.000   | 0.000   | 0.000   |    |
| 10                     | 0.000    | 0.000    | 0.001    | 0.043    | 0.012   | 0.008   | 0.017   | 0.000   | 0.999   |    |
| 11                     | 0.999    | 0.029    | 0.031    | 0.094    | 0.010   | 0.005   | 0.008   | 0.000   | 0.028   |    |
| 12                     | 0.167    | 0.030    | 0.040    | 0.154    | 0.011   | 0.005   | 0.007   | 0.999   | 0.031   |    |

| state (Emission order) | H3K27me1 | H3K27me2 | H3K27me3 | H3K36me3 | H3K4me2 | H3K4me3 | H3K56ac | H3K9me2 | H3K9me3 | 13 |
|------------------------|----------|----------|----------|----------|---------|---------|---------|---------|---------|----|
| 1                      | 0.002    | 0.002    | 0.000    | 0.000    | 0.350   | 0.490   | 0.998   | 0.002   | 0.004   |    |
| 2                      | 0.000    | 0.000    | 0.000    | 0.000    | 0.000   | 0.000   | 0.000   | 0.000   | 0.000   |    |
| 3                      | 0.004    | 0.039    | 0.999    | 0.124    | 0.148   | 0.000   | 0.995   | 0.006   | 0.028   |    |
| 4                      | 0.000    | 0.000    | 0.999    | 0.085    | 0.087   | 0.000   | 0.000   | 0.000   | 0.021   |    |
| 5                      | 0.002    | 0.011    | 0.999    | 0.151    | 0.628   | 0.989   | 0.348   | 0.004   | 0.015   |    |
| 6                      | 0.000    | 0.000    | 0.000    | 0.000    | 0.000   | 0.995   | 0.000   | 0.000   | 0.000   |    |
| 7                      | 0.001    | 0.001    | 0.000    | 0.000    | 0.999   | 0.297   | 0.001   | 0.001   | 0.002   |    |
| 8                      | 0.003    | 0.002    | 0.000    | 1.000    | 1.000   | 0.449   | 0.359   | 0.002   | 0.006   |    |
| 9                      | 0.001    | 0.000    | 0.000    | 0.999    | 0.000   | 0.268   | 0.266   | 0.001   | 0.001   |    |
| 10                     | 0.167    | 0.030    | 0.040    | 0.154    | 0.013   | 0.005   | 0.006   | 0.999   | 0.031   |    |
| 11                     | 0.999    | 0.030    | 0.032    | 0.094    | 0.012   | 0.005   | 0.007   | 0.000   | 0.029   |    |
| 12                     | 0.000    | 0.000    | 0.001    | 0.043    | 0.012   | 0.008   | 0.017   | 0.000   | 0.999   |    |
| 13                     | 0.001    | 0.999    | 0.174    | 0.067    | 0.028   | 0.009   | 0.021   | 0.000   | 0.076   |    |

| state (Emission order) | H3K27me1 | H3K27me2 | H3K27me3 | H3K36me3 | H3K4me2 | H3K4me3 | H3K56ac | H3K9me2 | H3K9me3 | 14 |
|------------------------|----------|----------|----------|----------|---------|---------|---------|---------|---------|----|
| 1                      | 0.999    | 0.030    | 0.032    | 0.093    | 0.010   | 0.005   | 0.007   | 0.000   | 0.029   |    |
| 2                      | 0.167    | 0.030    | 0.040    | 0.153    | 0.011   | 0.005   | 0.006   | 0.999   | 0.031   |    |
| 3                      | 0.001    | 0.000    | 0.000    | 0.999    | 0.000   | 0.268   | 0.266   | 0.001   | 0.001   |    |
| 4                      | 0.003    | 0.002    | 0.000    | 1.000    | 0.999   | 0.998   | 0.607   | 0.003   | 0.006   |    |
| 5                      | 0.005    | 0.004    | 0.000    | 1.000    | 1.000   | 0.000   | 0.154   | 0.006   | 0.007   |    |
| 6                      | 0.001    | 0.001    | 0.000    | 0.000    | 0.999   | 0.297   | 0.001   | 0.002   | 0.002   |    |
| 7                      | 0.002    | 0.011    | 0.999    | 0.151    | 0.628   | 0.989   | 0.348   | 0.004   | 0.015   |    |
| 8                      | 0.000    | 0.000    | 0.999    | 0.085    | 0.087   | 0.000   | 0.000   | 0.000   | 0.021   |    |
| 9                      | 0.004    | 0.039    | 0.999    | 0.124    | 0.148   | 0.000   | 0.995   | 0.006   | 0.028   |    |
| 10                     | 0.000    | 0.000    | 0.000    | 0.000    | 0.000   | 0.000   | 0.000   | 0.000   | 0.000   |    |
| 11                     | 0.002    | 0.002    | 0.000    | 0.000    | 0.350   | 0.490   | 0.998   | 0.002   | 0.004   |    |
| 12                     | 0.000    | 0.000    | 0.000    | 0.000    | 0.000   | 0.995   | 0.000   | 0.000   | 0.000   |    |
| 13                     | 0.000    | 0.000    | 0.001    | 0.043    | 0.012   | 0.008   | 0.017   | 0.000   | 0.999   |    |
| 14                     | 0.001    | 0.999    | 0.174    | 0.065    | 0.026   | 0.009   | 0.021   | 0.000   | 0.076   |    |

| state (Emission order) | H3K27me1 | H3K27me2 | H3K27me3 | H3K36me3 | H3K4me2 | H3K4me3 | H3K56ac | H3K9me2 | H3K9me3 | 15 |
|------------------------|----------|----------|----------|----------|---------|---------|---------|---------|---------|----|
| 1                      | 0.999    | 0.030    | 0.032    | 0.093    | 0.010   | 0.005   | 0.007   | 0.000   | 0.029   |    |
| 2                      | 0.167    | 0.030    | 0.040    | 0.152    | 0.011   | 0.005   | 0.006   | 0.999   | 0.031   |    |
| 3                      | 0.000    | 0.000    | 0.000    | 0.999    | 0.000   | 0.000   | 0.085   | 0.000   | 0.000   |    |
| 4                      | 0.005    | 0.004    | 0.000    | 1.000    | 1.000   | 0.000   | 0.154   | 0.006   | 0.007   |    |
| 5                      | 0.003    | 0.002    | 0.000    | 1.000    | 1.000   | 0.998   | 0.607   | 0.003   | 0.006   |    |
| 6                      | 0.002    | 0.001    | 0.000    | 1.000    | 0.000   | 0.991   | 0.751   | 0.002   | 0.003   |    |
| 7                      | 0.000    | 0.000    | 0.000    | 0.000    | 0.000   | 0.995   | 0.000   | 0.000   | 0.000   |    |
| 8                      | 0.002    | 0.011    | 0.999    | 0.151    | 0.628   | 0.989   | 0.348   | 0.004   | 0.015   |    |
| 9                      | 0.000    | 0.000    | 0.999    | 0.085    | 0.087   | 0.000   | 0.000   | 0.000   | 0.021   |    |
| 10                     | 0.004    | 0.039    | 0.999    | 0.124    | 0.148   | 0.000   | 0.995   | 0.006   | 0.028   |    |
| 11                     | 0.000    | 0.000    | 0.000    | 0.000    | 0.000   | 0.000   | 0.000   | 0.000   | 0.000   |    |
| 12                     | 0.002    | 0.002    | 0.000    | 0.000    | 0.350   | 0.490   | 0.998   | 0.002   | 0.004   |    |
| 13                     | 0.001    | 0.001    | 0.000    | 0.000    | 0.999   | 0.297   | 0.001   | 0.002   | 0.002   |    |

|    |       |       |       |       |       |       |       |       |       |
|----|-------|-------|-------|-------|-------|-------|-------|-------|-------|
| 14 | 0.000 | 0.000 | 0.001 | 0.044 | 0.012 | 0.008 | 0.018 | 0.000 | 0.999 |
| 15 | 0.001 | 0.999 | 0.174 | 0.065 | 0.026 | 0.009 | 0.020 | 0.000 | 0.076 |

| state (Emission order) | H3K27me1 | H3K27me2 | H3K27me3 | H3K36me3 | H3K4me2 | H3K4me3 | H3K56ac | H3K9me2 | H3K9me3 | 16 |
|------------------------|----------|----------|----------|----------|---------|---------|---------|---------|---------|----|
| 1                      | 0.002    | 0.002    | 0.000    | 0.000    | 0.350   | 0.490   | 0.998   | 0.002   | 0.004   |    |
| 2                      | 0.000    | 0.000    | 0.000    | 0.000    | 0.000   | 0.000   | 0.000   | 0.000   | 0.000   |    |
| 3                      | 0.002    | 0.035    | 0.999    | 0.000    | 0.137   | 0.001   | 0.995   | 0.004   | 0.026   |    |
| 4                      | 0.000    | 0.000    | 0.999    | 0.000    | 0.081   | 0.000   | 0.000   | 0.000   | 0.021   |    |
| 5                      | 0.015    | 0.035    | 0.999    | 0.999    | 0.299   | 0.312   | 0.242   | 0.029   | 0.029   |    |
| 6                      | 0.000    | 0.000    | 0.000    | 0.999    | 0.000   | 0.000   | 0.085   | 0.000   | 0.000   |    |
| 7                      | 0.005    | 0.004    | 0.000    | 1.000    | 1.000   | 0.000   | 0.154   | 0.006   | 0.007   |    |
| 8                      | 0.003    | 0.002    | 0.000    | 1.000    | 1.000   | 0.998   | 0.607   | 0.003   | 0.006   |    |
| 9                      | 0.002    | 0.001    | 0.000    | 1.000    | 0.000   | 0.991   | 0.751   | 0.003   | 0.003   |    |
| 10                     | 0.000    | 0.000    | 0.000    | 0.000    | 0.000   | 0.995   | 0.000   | 0.000   | 0.000   |    |
| 11                     | 0.002    | 0.009    | 0.999    | 0.000    | 0.631   | 0.988   | 0.329   | 0.003   | 0.014   |    |
| 12                     | 0.001    | 0.001    | 0.000    | 0.000    | 0.999   | 0.297   | 0.001   | 0.002   | 0.002   |    |
| 13                     | 0.000    | 0.000    | 0.001    | 0.044    | 0.012   | 0.008   | 0.018   | 0.000   | 0.999   |    |
| 14                     | 0.001    | 0.999    | 0.166    | 0.055    | 0.024   | 0.008   | 0.021   | 0.000   | 0.077   |    |
| 15                     | 0.999    | 0.029    | 0.027    | 0.088    | 0.010   | 0.005   | 0.007   | 0.000   | 0.028   |    |
| 16                     | 0.169    | 0.029    | 0.032    | 0.145    | 0.010   | 0.005   | 0.006   | 0.999   | 0.031   |    |

| state (Emission order) | H3K27me1 | H3K27me2 | H3K27me3 | H3K36me3 | H3K4me2 | H3K4me3 | H3K56ac | H3K9me2 | H3K9me3 | 17 |
|------------------------|----------|----------|----------|----------|---------|---------|---------|---------|---------|----|
| 1                      | 0.001    | 0.001    | 0.000    | 0.000    | 0.999   | 0.295   | 0.006   | 0.002   | 0.002   |    |
| 2                      | 0.005    | 0.004    | 0.000    | 1.000    | 1.000   | 0.000   | 0.155   | 0.006   | 0.007   |    |
| 3                      | 0.003    | 0.002    | 0.000    | 1.000    | 1.000   | 0.998   | 0.607   | 0.003   | 0.006   |    |
| 4                      | 0.002    | 0.001    | 0.000    | 1.000    | 0.000   | 0.996   | 0.750   | 0.003   | 0.003   |    |
| 5                      | 0.000    | 0.000    | 0.000    | 0.999    | 0.000   | 0.000   | 0.086   | 0.000   | 0.000   |    |
| 6                      | 0.015    | 0.035    | 0.999    | 0.999    | 0.299   | 0.312   | 0.242   | 0.029   | 0.029   |    |
| 7                      | 0.000    | 0.000    | 0.999    | 0.000    | 0.081   | 0.000   | 0.000   | 0.000   | 0.021   |    |
| 8                      | 0.002    | 0.035    | 0.999    | 0.000    | 0.137   | 0.000   | 0.995   | 0.004   | 0.026   |    |
| 9                      | 0.001    | 0.000    | 0.000    | 0.000    | 0.171   | 0.000   | 0.996   | 0.001   | 0.001   |    |
| 10                     | 0.002    | 0.003    | 0.000    | 0.000    | 0.529   | 0.998   | 0.999   | 0.002   | 0.007   |    |
| 11                     | 0.000    | 0.000    | 0.000    | 0.000    | 0.000   | 0.995   | 0.000   | 0.000   | 0.000   |    |
| 12                     | 0.002    | 0.009    | 0.999    | 0.000    | 0.631   | 0.988   | 0.329   | 0.003   | 0.014   |    |
| 13                     | 0.001    | 0.999    | 0.166    | 0.055    | 0.025   | 0.008   | 0.021   | 0.000   | 0.077   |    |
| 14                     | 0.000    | 0.000    | 0.000    | 0.000    | 0.000   | 0.000   | 0.000   | 0.000   | 0.000   |    |
| 15                     | 0.999    | 0.029    | 0.027    | 0.088    | 0.010   | 0.005   | 0.007   | 0.000   | 0.028   |    |
| 16                     | 0.169    | 0.029    | 0.032    | 0.145    | 0.010   | 0.005   | 0.006   | 0.999   | 0.031   |    |
| 17                     | 0.000    | 0.000    | 0.001    | 0.044    | 0.013   | 0.008   | 0.019   | 0.000   | 0.999   |    |

| state (Emission order) | H3K27me1 | H3K27me2 | H3K27me3 | H3K36me3 | H3K4me2 | H3K4me3 | H3K56ac | H3K9me2 | H3K9me3 | 18 |
|------------------------|----------|----------|----------|----------|---------|---------|---------|---------|---------|----|
| 1                      | 0.002    | 0.001    | 0.000    | 1.000    | 0.000   | 0.996   | 0.750   | 0.003   | 0.003   |    |
| 2                      | 0.003    | 0.002    | 0.000    | 1.000    | 1.000   | 0.998   | 0.607   | 0.003   | 0.006   |    |
| 3                      | 0.006    | 0.004    | 0.000    | 1.000    | 1.000   | 0.000   | 0.154   | 0.006   | 0.007   |    |
| 4                      | 0.000    | 0.000    | 0.000    | 0.999    | 0.000   | 0.000   | 0.086   | 0.000   | 0.000   |    |
| 5                      | 0.023    | 0.056    | 0.999    | 0.998    | 0.166   | 0.177   | 0.182   | 0.040   | 0.035   |    |
| 6                      | 0.000    | 0.000    | 0.999    | 0.000    | 0.000   | 0.000   | 0.000   | 0.000   | 0.021   |    |
| 7                      | 0.002    | 0.036    | 0.999    | 0.000    | 0.000   | 0.002   | 0.995   | 0.005   | 0.026   |    |
| 8                      | 0.001    | 0.000    | 0.000    | 0.000    | 0.171   | 0.000   | 0.996   | 0.001   | 0.001   |    |
| 9                      | 0.002    | 0.003    | 0.000    | 0.000    | 0.529   | 0.998   | 0.999   | 0.002   | 0.007   |    |
| 10                     | 0.000    | 0.000    | 0.000    | 0.000    | 0.000   | 0.995   | 0.000   | 0.000   | 0.000   |    |
| 11                     | 0.002    | 0.008    | 0.999    | 0.084    | 0.658   | 0.998   | 0.347   | 0.003   | 0.014   |    |
| 12                     | 0.006    | 0.025    | 0.999    | 0.002    | 0.998   | 0.000   | 0.165   | 0.007   | 0.019   |    |
| 13                     | 0.010    | 0.002    | 0.000    | 0.000    | 0.999   | 0.293   | 0.007   | 0.002   | 0.003   |    |
| 14                     | 0.000    | 0.000    | 0.001    | 0.044    | 0.012   | 0.008   | 0.019   | 0.000   | 0.999   |    |
| 15                     | 0.006    | 0.999    | 0.156    | 0.049    | 0.019   | 0.009   | 0.021   | 0.000   | 0.076   |    |
| 16                     | 0.000    | 0.000    | 0.000    | 0.000    | 0.000   | 0.000   | 0.000   | 0.000   | 0.000   |    |
| 17                     | 0.999    | 0.026    | 0.023    | 0.088    | 0.001   | 0.004   | 0.007   | 0.000   | 0.027   |    |
| 18                     | 0.168    | 0.029    | 0.029    | 0.144    | 0.009   | 0.005   | 0.006   | 0.999   | 0.030   |    |

| state (Emission order) | H3K27me1 | H3K27me2 | H3K27me3 | H3K36me3 | H3K4me2 | H3K4me3 | H3K56ac | H3K9me2 | H3K9me3 | 19 |
|------------------------|----------|----------|----------|----------|---------|---------|---------|---------|---------|----|
| 1                      | 0.002    | 0.002    | 0.000    | 1.000    | 0.000   | 0.996   | 0.750   | 0.003   | 0.003   |    |
| 2                      | 0.003    | 0.002    | 0.000    | 1.000    | 1.000   | 0.999   | 0.607   | 0.003   | 0.006   |    |
| 3                      | 0.006    | 0.004    | 0.000    | 1.000    | 1.000   | 0.000   | 0.154   | 0.006   | 0.007   |    |
| 4                      | 0.000    | 0.000    | 0.000    | 0.999    | 0.000   | 0.000   | 0.086   | 0.000   | 0.000   |    |
| 5                      | 0.028    | 0.063    | 0.999    | 0.998    | 0.152   | 0.007   | 0.138   | 0.047   | 0.038   |    |
| 6                      | 0.000    | 0.000    | 0.999    | 0.000    | 0.000   | 0.000   | 0.000   | 0.000   | 0.021   |    |
| 7                      | 0.002    | 0.036    | 0.999    | 0.001    | 0.000   | 0.000   | 0.995   | 0.005   | 0.026   |    |
| 8                      | 0.001    | 0.000    | 0.000    | 0.000    | 0.170   | 0.000   | 0.996   | 0.001   | 0.001   |    |
| 9                      | 0.002    | 0.003    | 0.000    | 0.000    | 0.529   | 0.998   | 0.999   | 0.002   | 0.007   |    |
| 10                     | 0.000    | 0.000    | 0.000    | 0.000    | 0.000   | 0.995   | 0.000   | 0.000   | 0.000   |    |
| 11                     | 0.002    | 0.014    | 0.999    | 0.154    | 0.000   | 0.996   | 0.324   | 0.003   | 0.016   |    |
| 12                     | 0.002    | 0.011    | 1.000    | 0.146    | 1.000   | 0.998   | 0.365   | 0.005   | 0.015   |    |
| 13                     | 0.006    | 0.025    | 0.999    | 0.003    | 0.998   | 0.000   | 0.165   | 0.007   | 0.019   |    |
| 14                     | 0.010    | 0.002    | 0.000    | 0.000    | 0.999   | 0.293   | 0.008   | 0.002   | 0.003   |    |
| 15                     | 0.000    | 0.000    | 0.001    | 0.044    | 0.012   | 0.008   | 0.019   | 0.000   | 0.999   |    |
| 16                     | 0.006    | 0.999    | 0.154    | 0.048    | 0.019   | 0.007   | 0.021   | 0.000   | 0.076   |    |
| 17                     | 0.000    | 0.000    | 0.000    | 0.000    | 0.000   | 0.000   | 0.000   | 0.000   | 0.000   |    |
| 18                     | 0.999    | 0.025    | 0.022    | 0.088    | 0.001   | 0.004   | 0.007   | 0.000   | 0.027   |    |
| 19                     | 0.168    | 0.029    | 0.028    | 0.143    | 0.009   | 0.005   | 0.006   | 0.999   | 0.030   |    |

| state (Emission order) | H3K27me1 | H3K27me2 | H3K27me3 | H3K36me3 | H3K4me2 | H3K4me3 | H3K56ac | H3K9me2 | H3K9me3 | 20 |
|------------------------|----------|----------|----------|----------|---------|---------|---------|---------|---------|----|
| 1                      | 0.002    | 0.002    | 0.000    | 1.000    | 0.000   | 0.996   | 0.751   | 0.002   | 0.003   |    |
| 2                      | 0.002    | 0.002    | 0.000    | 1.000    | 1.000   | 0.998   | 0.607   | 0.003   | 0.006   |    |

|    |       |       |       |       |       |       |       |       |       |
|----|-------|-------|-------|-------|-------|-------|-------|-------|-------|
| 3  | 0.006 | 0.004 | 0.000 | 1.000 | 1.000 | 0.000 | 0.155 | 0.000 | 0.007 |
| 4  | 0.000 | 0.000 | 0.000 | 0.999 | 0.000 | 0.000 | 0.086 | 0.000 | 0.000 |
| 5  | 0.023 | 0.056 | 0.999 | 0.999 | 0.157 | 0.002 | 0.142 | 0.001 | 0.035 |
| 6  | 0.000 | 0.000 | 0.999 | 0.000 | 0.000 | 0.000 | 0.000 | 0.000 | 0.021 |
| 7  | 0.002 | 0.036 | 0.999 | 0.001 | 0.000 | 0.000 | 0.995 | 0.005 | 0.026 |
| 8  | 0.001 | 0.000 | 0.000 | 0.000 | 0.170 | 0.000 | 0.996 | 0.001 | 0.001 |
| 9  | 0.002 | 0.003 | 0.000 | 0.000 | 0.529 | 0.998 | 0.999 | 0.002 | 0.007 |
| 10 | 0.000 | 0.000 | 0.000 | 0.000 | 0.000 | 0.995 | 0.000 | 0.000 | 0.000 |
| 11 | 0.003 | 0.014 | 0.999 | 0.156 | 0.000 | 0.996 | 0.324 | 0.003 | 0.016 |
| 12 | 0.002 | 0.011 | 1.000 | 0.147 | 1.000 | 0.998 | 0.365 | 0.005 | 0.015 |
| 13 | 0.006 | 0.025 | 0.999 | 0.002 | 0.998 | 0.000 | 0.165 | 0.007 | 0.019 |
| 14 | 0.010 | 0.002 | 0.000 | 0.000 | 0.999 | 0.293 | 0.008 | 0.002 | 0.003 |
| 15 | 0.000 | 0.000 | 0.001 | 0.044 | 0.012 | 0.008 | 0.019 | 0.000 | 0.999 |
| 16 | 0.007 | 0.999 | 0.155 | 0.048 | 0.019 | 0.007 | 0.021 | 0.000 | 0.076 |
| 17 | 0.000 | 0.000 | 0.000 | 0.000 | 0.000 | 0.000 | 0.000 | 0.000 | 0.000 |
| 18 | 0.999 | 0.025 | 0.022 | 0.087 | 0.000 | 0.004 | 0.007 | 0.000 | 0.027 |
| 19 | 0.248 | 0.049 | 0.077 | 0.999 | 0.040 | 0.010 | 0.015 | 0.999 | 0.040 |
| 20 | 0.152 | 0.027 | 0.032 | 0.000 | 0.008 | 0.005 | 0.005 | 0.999 | 0.029 |
