# Supplementary material for: Chromatin state analysis of the barley epigenome reveals a higher‐order structure defined by H3K27me1 and H3K27me3 abundance
Source: PubMed Central journal article supplement (PMC4973852; doi:10.1111/tpj.12963), 2015-09-09
Supplement: TPJ-84-111-s011.pdf [file TPJ-84-111-s011.pdf]

**Table S4: Antibodies used in this study**

| <b>Targeted epitope</b> | <b>Clonality</b> | <b>Manufacturer</b> | <b>Product code</b> | <b>Lot number</b> |
|-------------------------|------------------|---------------------|---------------------|-------------------|
| H3                      | Polyclonal       | Abcam               | ab1791              | GR81366-1         |
| H3K4me2                 | Monoclonal       | Abcam               | ab32356             | GR39894-3         |
| H3K4me3                 | Polyclonal       | Active Motif        | 39159               | 1609004           |
| H3K9me2                 | Polyclonal       | Active Motif        | 39375               | 29108001          |
| H3K9me3                 | Polyclonal       | Millipore           | 07-442              | JBC1865906        |
| H3K27me1                | Polyclonal       | Millipore           | 07-448              | DAM1661077        |
| H3K27me2                | Polyclonal       | Millipore           | 07-452              | JBC1870071        |
| H3K27me3                | Polyclonal       | Millipore           | 07-449              | JBC1873477        |
| H3K36me3                | Polyclonal       | Abcam               | ab9050              | GR20245-2         |
| H3K56ac                 | Polyclonal       | Active Motif        | 39281               | 16908001          |
