# Supplementary material for: Chromatin state analysis of the barley epigenome reveals a higher‐order structure defined by H3K27me1 and H3K27me3 abundance
Source: PubMed Central journal article supplement (PMC4973852; doi:10.1111/tpj.12963), 2015-09-09
Supplement: TPJ-84-111-s012.pdf [file TPJ-84-111-s012.pdf]

**Table S5: qPCR validation of peak finding softwares**

|              |            | H3K56 peak identification |                          |      |      |           |        |
|--------------|------------|---------------------------|--------------------------|------|------|-----------|--------|
| Gene         |            | Forward primer (5' → 3')  | Reverse primer (5' → 3') | qPCR | CCAT | FindPeaks | SISSRS |
| <i>DREB1</i> | MLOC_66686 | CTTTGTCCTATCCCTTGTC       | CAATCCCATTGACGCATAA      | -++  | --+  | ---       | ---    |
| <i>HKT1</i>  | MLOC_13204 | GAGTGACGGAGGGAAGTTTG      | CAATTTGGTACATTTGCCTTTC   | --+  | -++  | --+       | ---    |
| <i>HVA</i>   | MLOC_59546 | TGGGGACTGGATAAGAAACTG     | AGCCAATTAACAGATGGGAAAT   | -++  | --+  | ---       | ---    |
| <i>HVP10</i> | MLOC_36965 | GGATTGCCGAGTTACCTAC       | TACCAACGAGGGAGGACATC     | ---  | -+-  | -+-       | ---    |
| <i>NHX1</i>  | MLOC_4602  | GCATATTGACAAAGCCTTGAT     | GAGGAGAGTGCAGGGACTTC     | +--  | -+-  | ---       | ---    |
| <i>RAF</i>   | MLOC_13305 | CCCGAGCTGATGGAGTTTT       | CGTCCCCACAGAAGAGTC       | +--+ | +++  | +--       | -+-    |
| <i>SOS1</i>  | MLOC_36509 | CAAGGATTTGCTCCCTCAG       | ATGCCCGAGTTCAATTTCTT     | ---  | ---  | ---       | ---    |
| <i>SOS2</i>  | MLOC_67101 | GAAGTGGGACGACGACAAC       | CTCGAACAGCCCCGATAG       | +++  | +++  | ++-       | ---    |

Accuracy 70% 63% 48%
